# Supplementary material for: Targeted delivery of microRNA-126 to vascular endothelial cells via REDV peptide modified PEG-trimethyl chitosan
Source: Royal Society of Chemistry journal article supplement (doi:10.1039/c5bm00629e), 2016-01-01
Supplement: c5bm00629e1.pdf [file c5bm00629e1.pdf]

## Electronic Supplementary information

### Target delivery of microRNA-126 to vascular endothelial cells *via* REDV peptide-modified PEG-trimethyl chitosan

Fang Zhou,<sup>a,1</sup> Xiaoling Jia,<sup>b,1</sup> Qingmao Yang,<sup>b</sup> Yang Yang,<sup>a</sup> Yunhui Zhao,<sup>a</sup> Yubo Fan<sup>b,c,\*</sup> and Xiaoyan Yuan<sup>a,\*</sup>

<sup>a</sup> School of Materials Science and Engineering, and Tianjin Key Laboratory of Composite and Functional Materials, Tianjin University, Tianjin 300072, China. E-mail: yuanxy@tju.edu.cn; xyuan28@yahoo.com

<sup>b</sup> Key Laboratory for Biomechanics and Mechanobiology of Ministry of Education, School of Biological Science and Medical Engineering, Beihang University, Beijing 100083, China. E-mail:  
yubofan@buaa.edu.cn

<sup>c</sup> National Research Center for Rehabilitation Technical Aids, Beijing 100176, China.

<sup>1</sup> Fang Zhou and Xiaoling Jia contributed equally to this work.

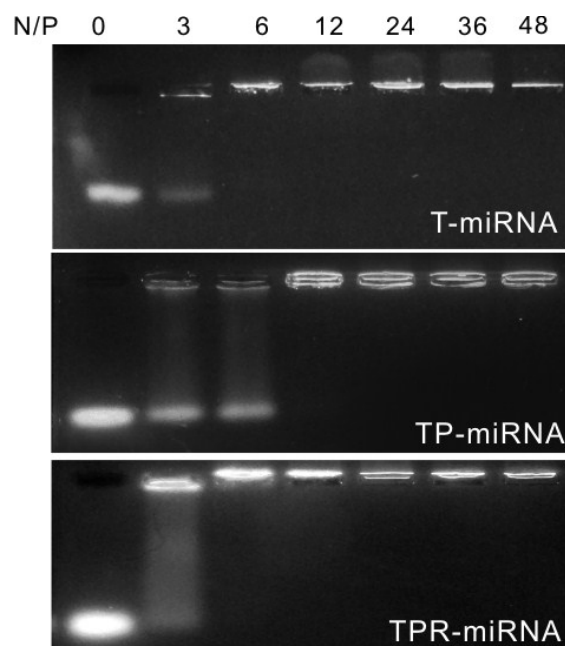

**Fig. S 1 Agarose gel electrophoresis of T-miRNA, TP-miRNA and TPR-miRNA complexes at different N/P molar ratios.**

The binding capacity of miRNA with polyplexes was evaluated by gel retardation assay. As shown in Fig. S1, the migrations of miRNA in agarose gel were completely retarded when the N/P molar ratio was greater than 6 for T-miRNA and 12 for TP-miRNA and TPR-miRNA, respectively. It was suggested that TMC, TMC-g-PEG and TMC-g-PEG-REDV could effectively combine and compact miRNA into relatively stable complexes at an N/P molar ratio equal or greater than 6, 12 and 12, respectively.

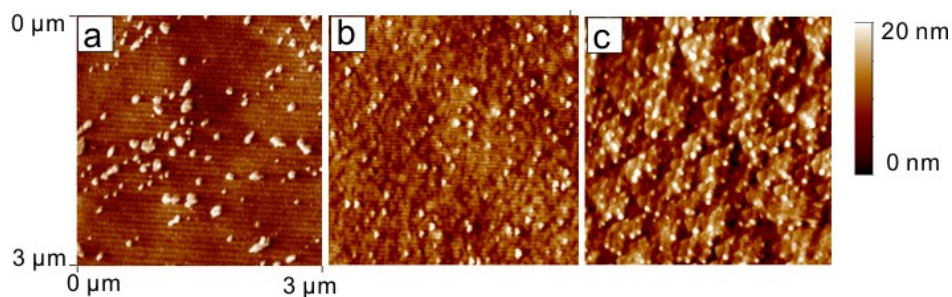

**Fig. S2 AFM topography images of T-miRNA (a), TP-miRNA (b), and TPR-miRNA (c) complexes.**

The morphology of polyplex/miRNA complexes at N/P=12 was investigated by AFM. Samples were imaged at  $3\ \mu\text{m} \times 3\ \mu\text{m}$  magnifications using a nanosensor silicon tip. In the AFM topography images, the diameters of the complexes were about  $94 \pm 6.6\ \text{nm}$ ,  $54 \pm 2.7\ \text{nm}$  and  $55 \pm 2.5\ \text{nm}$ , respectively. TPR-miRNA and T-miRNA had a smaller diameter than T-miRNA, consistent with the size measured by TEM.

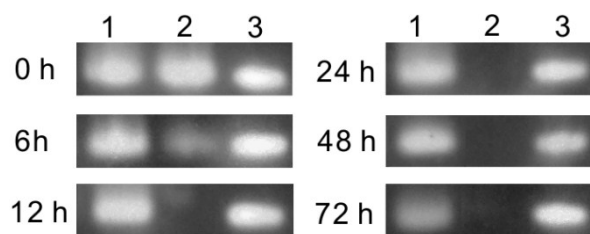

**Fig. S3 miRNA serum stability. Lane 1: TPR-miRNA; Lane 2: naked miRNA; Lane 3: intact miRNA.**

The miRNA protection effect of TPR polyplex in TPR-miRNA was monitored by 50 % serum stability assay with intact miRNA as a positive control (Lane 3). As shown in Fig. S3, naked miRNA displayed faint bands after 6 h and was fully degraded after 24 h (Lane 2), suggesting that naked miRNA was prone to degradation in serum. In contrast, the degradation of the miRNA recovered from TPR-miRNA complexes started after 24 h, but complete degradation was not observed even after 72 h.
